# Supplementary material
Source: Springer Nature journal article supplement (https://www.springermedizin.de/resource/supplementary/12885_2009_1949_MOESM5_ESM.pdf/9460162)
Supplement: MOESM5 [file 9460162]

## Concordance between first diagnosis and the expert review

Table 3: Reasons for non-concordance

| <b>Reasons for non-concordance</b>  | <b>Frequency</b> | <b>%</b>    |
|-------------------------------------|------------------|-------------|
| Grade                               | 68               | 18.5        |
| Histological type                   | 39               | 10.7        |
| Grade and Histological type         | 30               | 8.2         |
| Subtype                             | 17               | 4.6         |
| Grade and subtype                   | 13               | 3.6         |
| <b>SUB-TOTAL</b>                    | <b>167</b>       | <b>45.6</b> |
| <i>Patient with total agreement</i> | <i>199</i>       | <i>54.4</i> |
| <b>TOTAL</b>                        | <b>366</b>       | <b>100</b>  |
